# Supplementary material for: A dual gradient-projection method for large-scale strictly convex quadratic problems
Source: Springer Nature journal article supplement (doi:10.1007/s10589-016-9886-1), 2016-12-01
Supplement: 10589_2016_9886_MOESM1_ESM.pdf [file 10589_2016_9886_MOESM1_ESM.pdf]

# Supplementary Material: A Dual Gradient-Projection Method for Large-Scale Strictly Convex Quadratic Problems \*

Nicholas I. M. Gould †      Daniel P. Robinson ‡

November 29, 2016

## Abstract

This is the supplementary material for the manuscript titled “A Dual Gradient-Projection Method for Large-Scale Strictly Convex Quadratic Problems”. In Section 1 we present a method for computing a direction of linear infinite descent that is an alternative to the strategy described in the main manuscript. In Section 2 we provide the detailed output from our solver DQP on the entire test set considered in the main manuscript. Finally, in Section 3 we provide the detailed output for the number of required iterations and the required time to reach the various tolerance levels, as described in Section 5.2 of the main manuscript.

## 1 Directions of linear infinite descent using $A^F$

We show how one might find a suitable  $\Delta y_\infty^F$  satisfying (32) from the manuscript when  $c^F$  is not in the range space of  $A^F$  (i.e., when (28) from the manuscript is inconsistent). Recall that  $A^F$  has  $m_k$  rows, and suppose that

$$A^F = P \begin{pmatrix} L \\ M \end{pmatrix} (U \ N), \quad (1)$$

where  $P$  is a permutation matrix,  $L$  and  $U$  are, respectively,  $r_k$  by  $r_k$  unit lower and upper triangular matrices, and the rank  $r_k \leq \min(n, m_k)$ ; such a “rectangular” LU factorization is implemented in many modern sparse-matrix packages (e.g., LUSOL [3], MA48 [2] and MUMPS [1]). Let

$$\begin{pmatrix} c_1^F \\ c_2^F \end{pmatrix} = P^T c^F, \quad (2)$$

where  $c_1^F$  has  $r_k$  components. The following holds.

**Lemma 1.** *Suppose that  $c^F$  does not lie in the range of  $A^F$ . Then*

$$d^F := c_2^F - ML^{-1}c_1^F \neq 0. \quad (3)$$

*Proof.* For a contrapositive proof, suppose that  $c_2^F = ML^{-1}c_1^F$ . Writing  $w = L^{-1}c_1^F$ , we have

$$\begin{pmatrix} L \\ M \end{pmatrix} w = \begin{pmatrix} c_1^F \\ c_2^F \end{pmatrix}$$

or equivalently  $A^F v = c^F$ , where  $v = \begin{pmatrix} U^{-1}w \\ 0 \end{pmatrix}$ . This completes the proof since this shows that  $c^F$  lies in the range of  $A^F$ . □

---

\*N.I.M. Gould’s research supported by EPSRC grants EP/I013067/1 and EP/M025179/1.

†Scientific Computing Department, STFC-Rutherford Appleton Laboratory, Chilton, Oxfordshire OX11 0QX, England, nick.gould@stfc.ac.uk

‡Department of Applied Mathematics and Statistics, The Johns Hopkins University, Baltimore, MD 21218, USA, daniel.p.robinson@gmail.com

This result allows us to determine whether there is a direction of linear infinite descent by checking whether  $d^F$  is zero or not; in practice small rounding errors need to be taken into account.

Next, let  $d^F$  be nonzero,  $D$  be any diagonal matrix with  $D_{ii} \geq 0$ , and  $Dd^F \neq 0$ , and then define

$$\Delta y_{D2}^F := Dd^F \quad (4)$$

and

$$\Delta y_{D1}^F := -L^{-T} M^T \Delta y_{D2}^F. \quad (5)$$

Then we have the following crucial result.

**Lemma 2.** *Suppose that  $c^F$  does not lie in the range of  $A^F$ , and that  $\Delta y_{D2}^F$  and  $\Delta y_{D1}^F$  are defined by (4) and (5). Then, the vector*

$$\Delta y_\infty^F = P \begin{pmatrix} \Delta y_{D1}^F \\ \Delta y_{D2}^F \end{pmatrix} \quad (6)$$

satisfies (32) from the manuscript.

*Proof.* It follows trivially from (1), (6), and (5) that

$$(A^F)^T \Delta y_\infty^F = \begin{pmatrix} U^T \\ N^T \end{pmatrix} (L^T \ M^T) P^T \Delta y_\infty^F = \begin{pmatrix} U^T \\ N^T \end{pmatrix} (L^T \Delta y_{D1}^F + M^T \Delta y_{D2}^F) = 0.$$

Moreover (5) implies that

$$\langle \Delta y_{D1}^F, c_1^F \rangle = -\langle L^{-T} M^T \Delta y_{D2}^F, c_1^F \rangle = -\langle \Delta y_{D2}^F, M L^{-1} c_1^F \rangle,$$

which together with (6), (2), and the definition of  $D$  shows that

$$\langle \Delta y_\infty^F, c^F \rangle = \langle \Delta y_{D1}^F, c_1^F \rangle + \langle \Delta y_{D2}^F, c_2^F \rangle = \langle \Delta y_{D2}^F, c_2^F - M L^{-1} c_1^F \rangle = \langle Dd^F, d^F \rangle > 0,$$

where we used Lemma 1 to derive the last inequality. This completes the proof.  $\square$

Of course the action of the inverses in (3) and (5) would be implemented in practice as forward and back solves with the triangular  $L$  and its transpose. The most obvious choices for  $D$  are the identity matrix, in which case  $\Delta y_{D2}^F = d^F$ , or the rank-one matrix  $e_j e_j^T$  for some  $j$  satisfying  $d_j^F \neq 0$ , in which case  $y_{D2}^F = d_j^F e_j$ . We summarize our procedure in terms of general data  $A$  and  $c$  in Algorithm 1.

In practice, the LU factorization of  $A^F$  is preceded by block triangularization. Specifically, row and column permutations  $P$  and  $Q$  are applied so that

$$A^F = P \begin{pmatrix} A_{11}^F & 0 & \cdots & 0 \\ A_{21}^F & A_{22}^F & \ddots & 0 \\ \vdots & \vdots & \ddots & 0 \\ A_{\ell 1}^F & A_{\ell 2}^F & \cdots & A_{\ell \ell}^F \end{pmatrix} Q, \quad (7)$$

where each diagonal block, except perhaps the last, is square and order  $n_i$ , say. Vitaly, rather than computing the LU factors of  $A^F$ , only the diagonal blocks are factorized. That is, rather than finding (1), the factorizations

$$A_{ii}^F = \begin{pmatrix} L_{ii} \\ M_{ii} \end{pmatrix} (U_{ii} \ N_{ii}), \quad \text{for } i = 1, \dots, \ell, \quad (8)$$

involving triangular matrices  $L_{ii}$  and  $U_{ii}$  of order  $r_i \leq n_i$  are obtained (any further row permutations have been absorbed into  $P$ ). To discover whether there are directions of infinite descent and when they exist to find one, we proceed by considering the blocks.

---

**Algorithm 1** Computing a feasible direction or a direction of linear infinite descent satisfying the conditions in (32) from the manuscript.

---

**procedure**  $[\Delta x, \Delta y, flag] = \text{DOLID}(A, c)$

**input:**  $A \in \mathbb{R}^{m \times n}$  and  $c \in \mathbb{R}^m$ .

**1. (compute the LU factorization of A)**

Compute nonsingular matrices  $L$  and  $U$  in  $\mathbb{R}^{r \times r}$  and a permutation matrix  $P$  so that

$$A = P \begin{pmatrix} L \\ M \end{pmatrix} (U \ N),$$

**2. (compute a feasible point for  $A(x + \Delta x) = c$  or a direction of linear infinite descent)**

Compute

$$d = c_2 - Mw, \text{ where } \begin{pmatrix} c_1 \\ c_2 \end{pmatrix} = P^T c, \quad Lw = c_1, \text{ and } c_1 \in \mathbb{R}^r.$$

**if  $d = 0$  then**

Set *flag* to **false** and  $\Delta y = 0$ , and compute the feasible point

$$x + \Delta x = \begin{pmatrix} U^{-1}w \\ 0 \end{pmatrix}.$$

**else**

Compute diagonal matrix  $D$  such that  $D_{ii} \geq 0$  and  $Dd \neq 0$ .

Set *flag* to **true** and  $\Delta x = 0$ , and compute the direction of linear infinite descent

$$\Delta y = P \begin{pmatrix} \Delta y_1 \\ \Delta y_2 \end{pmatrix}, \text{ where } \Delta y_2 = Dd \text{ and } \Delta y_1 = -L^{-T} M^T \Delta y_2.$$

**end if**

**end procedure**

---

To illustrate the general procedure, suppose that after suitable row and column permutations

$$A = \begin{pmatrix} A_{11} & 0 \\ A_{21} & A_{22} \end{pmatrix} \text{ and } c = \begin{pmatrix} c_1 \\ c_2 \end{pmatrix}.$$

We first use Algorithm 1 to compute  $[\Delta x_1, \Delta y_1, flag] = \text{DOLID}(A_{11}, c_1)$ , and if *flag* is true, then

$$\Delta y := \begin{pmatrix} \Delta y_1 \\ 0 \end{pmatrix}$$

is a direction of linear infinite descent. If *flag* has the value false, then the vector  $c_1$  lies in the range of  $A_{11}$ . So now suppose there is a direction of linear infinite descent

$$\Delta y = \begin{pmatrix} \Delta y_1 \\ \Delta y_2 \end{pmatrix}$$

with  $\Delta y_2 \neq 0$ . In particular, this means that  $A^T \Delta y = 0$ , or equivalently that

$$A_{22}^T \Delta y_2 = 0 \text{ and } A_{11}^T \Delta y_1 = -A_{21}^T \Delta y_2.$$

In this case  $\Delta y_1 = -A_{11}^{+T} A_{21}^T \Delta y_2$ , where  $A_{11}^+$  is the generalized inverse of  $A_{11}$ , and

$$\langle c, \Delta y \rangle = \langle c_2 - A_{21} A_{11}^+ c_1, \Delta y_2 \rangle.$$

Thus we seek  $\Delta y_2$  for which

$$A_{22}^T \Delta y_2 = 0 \text{ and } \langle c_2^{(2)}, \Delta y_2 \rangle \neq 0, \text{ where } c_2^{(2)} := c_2 - A_{21} A_{11}^+ c_1.$$

We may check this by calling  $\text{DOLID}(A_{22}, c_2^{(2)})$ . Clearly this idea may be applied recursively by partitioning  $A_{21}$ ,  $A_{22}$ , and  $c_2$ . We summarize the procedure in Algorithm 2.

---

**Algorithm 2** Computing a feasible direction or a direction of linear infinite descent satisfying the conditions in (32) from the manuscript.

---

**input:** Matrix  $A^F$  factorized as in (7) and  $c^F$ .

Let  $c_j$  denote the  $j$ th block of components of  $P^T c^F$  for  $j = 1, 2, \dots, \ell$  and some  $\ell$ .

**for**  $i = 1, \dots, \ell$  **do**

Set  $c_i \leftarrow c_i - \sum_{j=1}^{i-1} A_{ij} \Delta x_j$  and compute  $[\Delta x_i, \Delta y_i, \text{flag}] = \text{dolid}(A_{ii}, c_i)$ .

**if**  $\text{flag}$  has the value true **then**

Back solve by performing  $A_{jj}^T \Delta y_j = -\sum_{k=j+1}^i A_{jk}^T \Delta y_k$  for  $j = i-1, \dots, 1$ .

**return** the direction of infinite descent

$$\Delta y^F = P \begin{pmatrix} \Delta y_1 \\ \vdots \\ \Delta y_i \\ 0 \end{pmatrix}.$$

**end if**

**if**  $i = \ell$  **then**

**return** there does not exist a direction of infinite descent.

**end if**

**end for**

---

Note that Algorithm 2 only provides the direction of linear infinite descent or confirms that there is no such direction. In the latter case, one has then to solve (30) from the manuscript to recover a solution (27) from the manuscript. Clearly it is inefficient to check for a direction of linear infinite descent when it is unlikely that there will be one, and equally it is wasteful to try to compute a finite minimizer when this is unlikely to happen. Pragmatically, therefore, we would apply the method of §2.3.1 from the manuscript when  $m_k \leq n$  and only resort to that from §2.3.2 from the manuscript when (30) from the manuscript is reported to be inconsistent. When  $m_k > n$ , the method in §2.3.2 of the manuscript takes precedence, and we only use (30) from the manuscript when we have failed to find a direction of linear infinite descent.

## 2 Detailed Summary of Numerical Results

Tables 1 (iterative subproblem solver) and 2 (direct subproblem solver) summarize the results of DQP for the test problems. We provide values for the objective value (Obj. Value), primal violation (Primal Viol.), dual violation (Dual Viol.), and complementarity violation (Comp. Viol.) at the final iterate. The number of iterations computed (Iters.) and time required (Time) are also supplied. The final column (Status) indicates the outcome of the solution process; see Table 3 for the meaning of each status value.

Table 1: Results for package DQP when an iterative subproblem solver is used.

| Name      | $n$   | $m$    | Obj. Value      | Primal Viol. | Dual Viol. | Comp. Viol. | Iters.  | Time     | Status |
|-----------|-------|--------|-----------------|--------------|------------|-------------|---------|----------|--------|
| AUG2DC    | 20200 | 10000  | 1.81836806E+06  | 5.5E-08      | 5.7E-14    | 5.3E-06     | 4       | 0.20     | 0      |
| AUG2DCQP  | 20200 | 10000  | 6.49813468E+06  | 4.7E-07      | 2.3E-13    | 1.3E-03     | 35      | 1.00     | 0      |
| AUG3DC    | 27543 | 8000   | 2.76540711E+04  | 1.2E-07      | 1.8E-15    | 1.8E-06     | 1       | 0.03     | 0      |
| AUG3DCQP  | 27543 | 8000   | 6.15603837E+04  | 1.6E-08      | 3.6E-15    | 5.9E-07     | 16      | 0.56     | 0      |
| BTS4      | 36570 | 36310  | 6.90514312E+07  | 6.8E-08      | 2.3E-13    | 1.4E-04     | 10      | 1.29     | 0      |
| CBS       | 11163 | 244    | 5.36161663E+06  | 4.7E-07      | 1.1E-13    | 1.7E-04     | 7       | 0.13     | 0      |
| CONT-050  | 2597  | 2401   | -4.56385182E+00 | 9.4E-07      | 4.1E-17    | 7.8E-08     | 1694    | 13.01    | 0      |
| CONT1-100 | 10197 | 9801   | -4.64440164E+00 | 9.9E-07      | 1.1E-16    | 1.1E-07     | 28743   | 894.66   | 0      |
| CONT1-200 | 40397 | 39601  | -4.73584419E+00 | 2.9E-01      | 2.8E-18    | 2.0E-03     | -13999  | -1800.10 | -19    |
| DALE      | 16514 | 405    | 1.82596990E+04  | 3.0E-08      | 1.8E-15    | 5.2E-08     | 6       | 0.20     | 0      |
| DEGENQP   | 50    | 125025 | 1.13968254E-09  | 1.1E-08      | 5.9E-14    | 5.5E-09     | 102     | 7.46     | 0      |
| DUAL1     | 85    | 1      | 3.50129677E-02  | 2.2E-11      | 3.3E-15    | 3.2E-10     | 10      | 0.51     | 0      |
| DUAL2     | 96    | 1      | 3.37336714E-02  | 8.9E-16      | 2.0E-15    | 3.2E-17     | 8       | 0.01     | 0      |
| DUAL3     | 111   | 1      | 1.35755832E-01  | 3.7E-12      | 6.0E-15    | 2.7E-10     | 8       | 0.01     | 0      |
| DUAL4     | 75    | 1      | 7.46090652E-01  | 4.9E-11      | 3.8E-15    | 1.6E-09     | 4       | 0.00     | 0      |
| FIVE20B   | 34552 | 52983  | 1.37339055E+08  | 9.7E-07      | 2.3E-13    | 1.5E-03     | 21      | 3.36     | 0      |
| FIVE20C   | 34501 | 58825  | 1.62654515E+08  | 1.6E-07      | 2.3E-13    | 1.9E-03     | 46      | 8.03     | 0      |
| HIE1327D  | 1183  | 1443   | 2.48905243E+06  | 7.3E-08      | 1.1E-13    | 9.6E-06     | 21      | 0.09     | 0      |
| HIE1372D  | 637   | 525    | 8.06298962E+05  | 8.4E-08      | 5.7E-14    | 3.8E-05     | 7       | 0.02     | 0      |
| HIER13    | 2020  | 3313   | 7.50704295E+06  | 8.1E-08      | 1.1E-13    | 6.4E-04     | 6       | 0.06     | 0      |
| HIER133A  | 2197  | 3549   | 7.28073418E+06  | 3.9E-07      | 2.3E-13    | 1.5E-03     | 18      | 0.17     | 0      |
| HIER133B  | 2197  | 3549   | 7.28073418E+06  | 3.9E-07      | 2.3E-13    | 1.5E-03     | 18      | 0.17     | 0      |
| HIER133C  | 2197  | 3549   | 7.28073418E+06  | 3.9E-07      | 2.3E-13    | 1.5E-03     | 18      | 0.17     | 0      |
| HIER133D  | 2197  | 3549   | 2.99559854E+07  | 4.6E-07      | 4.5E-13    | 1.7E-03     | 20      | 0.18     | 0      |
| HIER133E  | 2197  | 3549   | 2.99559854E+07  | 7.5E-08      | 2.3E-13    | 3.9E-04     | 23      | 0.21     | 0      |
| HIER16    | 3564  | 5484   | 1.04347325E+07  | 8.2E-09      | 1.1E-13    | 5.7E-05     | 8       | 0.12     | 0      |
| HIER163A  | 4096  | 5376   | 8.69609949E+06  | 3.5E-09      | 1.1E-13    | 6.1E-06     | 24      | 0.38     | 0      |
| HIER163B  | 4096  | 5376   | 8.69609949E+06  | 3.5E-09      | 1.1E-13    | 6.1E-06     | 24      | 0.38     | 0      |
| HIER163C  | 4096  | 5376   | 8.69609949E+06  | 3.5E-09      | 1.1E-13    | 6.1E-06     | 24      | 0.38     | 0      |
| HIER163D  | 4096  | 5376   | 3.47843980E+07  | 3.1E-07      | 1.1E-13    | 1.7E-04     | 26      | 0.41     | 0      |
| HIER163E  | 4096  | 5376   | 3.47843980E+07  | 3.1E-07      | 1.1E-13    | 1.7E-04     | 26      | 0.41     | 0      |
| HUES-MOD  | 5000  | 2      | 3.48244898E+07  | 3.0E-12      | 4.4E-16    | 2.5E-07     | 4       | 0.01     | 0      |
| HUESTIS   | 1000  | 2      | 3.48245418E+10  | 1.9E-12      | 0.0E+00    | 1.8E-04     | 4       | 0.00     | 0      |
| JJTABEL3  | 3025  | 1650   | 1.30980707E+14  | 3.7E-07      | 9.3E-10    | 1.2E+00     | 6544    | 50.55    | 0      |
| KSP       | 20    | 1001   | 5.75815430E-01  | 5.3E-07      | 2.2E-16    | 1.1E-05     | -100001 | -21.28   | -18    |
| LASER     | 1002  | 1000   | 1.14592952E+02  | 3.5E+02      | 9.5E-07    | 4.4E+02     | -100001 | -1722.22 | -18    |
| LISWET1   | 2002  | 2000   | 5.07215863E+00  | 3.6E-05      | 2.8E-14    | 1.1E-02     | -100001 | -410.40  | -18    |
| LISWET2   | 2002  | 2000   | 4.99798638E+00  | 9.0E-07      | 5.6E-16    | 1.7E-06     | 5920    | 24.17    | 0      |
| LISWET3   | 2002  | 2000   | 4.99776948E+00  | 9.3E-07      | 2.2E-16    | 1.5E-06     | 1649    | 6.53     | 0      |
| LISWET4   | 2002  | 2000   | 4.99779938E+00  | 9.7E-07      | 2.2E-16    | 2.5E-06     | 5786    | 22.83    | 0      |
| LISWET5   | 2002  | 2000   | 4.99782483E+00  | 9.8E-07      | 6.2E-16    | 2.0E-06     | 3208    | 12.77    | 0      |
| LISWET6   | 2002  | 2000   | 4.99788651E+00  | 9.6E-07      | 4.4E-16    | 1.3E-06     | 2360    | 9.40     | 0      |
| LISWET7   | 2002  | 2000   | 5.00215132E+00  | 1.4E-04      | 4.1E-14    | 5.4E-02     | -100001 | -411.09  | -18    |
| LISWET8   | 2002  | 2000   | 5.19206925E+00  | 1.4E-02      | 2.4E-13    | 1.4E-01     | -100001 | -397.44  | -18    |
| LISWET9   | 2002  | 2000   | 2.21560671E+01  | 7.5E-03      | 8.2E-13    | 1.7E+00     | -100001 | -398.40  | -18    |
| LISWET10  | 2002  | 2000   | 5.02426900E+00  | 1.6E-03      | 2.8E-14    | 6.0E-03     | -100001 | -400.56  | -18    |
| LISWET12  | 2002  | 2000   | 1.21770710E+01  | 8.0E-03      | 6.8E-13    | 3.4E+00     | -100001 | -401.34  | -18    |
| MOSARQP1  | 2500  | 700    | -3.82140982E+03 | 8.7E-07      | 7.1E-15    | 9.6E-07     | 62      | 0.98     | 0      |
| MOSARQP2  | 2500  | 700    | -5.05259194E+03 | 2.7E-07      | 7.1E-15    | 2.3E-06     | 20      | 0.37     | 0      |
| NINE12    | 10399 | 11362  | 3.27678548E+07  | 5.2E-07      | 1.1E-13    | 2.0E-04     | 12      | 0.47     | 0      |
| NINE5D    | 10733 | 17295  | 3.79459871E+07  | 1.1E-07      | 1.1E-13    | 3.6E-05     | 13      | 0.62     | 0      |
| NINENEW   | 6546  | 7340   | 2.73604976E+07  | 4.7E-07      | 2.3E-13    | 6.6E-04     | 12      | 0.30     | 0      |
| OSORIO    | 10201 | 202    | 1.13368430E+01  | 6.5E-09      | 2.5E-16    | 2.7E-08     | 7       | 0.07     | 0      |
| POWELL20  | 10000 | 10000  | 5.20898232E+10  | 1.0E-06      | 0.0E+00    | 5.0E+00     | 24611   | 419.11   | 0      |
| QPBAND    | 50000 | 25000  | -3.21962814E+06 | 0.0E+00      | 3.3E-01    | 2.9E+02     | -398    | -1800.56 | -19    |
| STCQP1    | 8193  | 4095   | 3.67100485E+05  | 1.2E-08      | 1.8E-12    | 2.9E-06     | 4       | 0.79     | 0      |
| STCQP2    | 8193  | 4095   | 3.71892743E+04  | 2.4E-07      | 4.8E-13    | 1.9E-05     | 32      | 2.88     | 0      |
| TABLE1    | 1584  | 510    | 2.78623226E+12  | 1.1E-08      | 2.3E-10    | 4.2E-03     | 1122    | 4.14     | 0      |
| TABLE3    | 4992  | 2464   | 2.93000638E+09  | 6.8E-09      | 1.8E-12    | 1.1E-04     | 29      | 0.43     | 0      |
| TABLE4    | 4992  | 2464   | 2.93000638E+09  | 6.8E-09      | 1.8E-12    | 1.1E-04     | 29      | 0.43     | 0      |
| TABLE5    | 4992  | 2464   | 2.93000638E+09  | 6.8E-09      | 1.8E-12    | 1.1E-04     | 29      | 0.43     | 0      |
| TABLE6    | 1584  | 510    | 2.78623226E+12  | 4.7E-08      | 1.2E-10    | 3.6E-02     | 1098    | 4.06     | 0      |
| TABLE7    | 624   | 230    | 7.79587339E+08  | 8.1E-08      | 3.6E-12    | 7.8E-05     | 13      | 0.02     | 0      |
| TABLE8    | 1271  | 72     | 1.91933038E+02  | 8.9E-09      | 1.7E-15    | 9.2E-10     | 3       | 0.01     | 0      |
| TARGUS    | 162   | 63     | 1.68744463E+07  | 1.3E-07      | 4.5E-13    | 2.7E-04     | 185     | 0.11     | 0      |
| TOYSARAH  | 2890  | 1649   | 5.89122424E+19  | 4.0E+02      | 1.2E-07    | 2.1E+11     | -100001 | -894.75  | -18    |
| TWO5IN6   | 5681  | 9629   | 1.91002932E+07  | 3.5E-07      | 2.3E-13    | 2.6E-04     | 10      | 0.27     | 0      |
| YAO       | 2002  | 2000   | 2.48349703E+01  | 5.7E-04      | 3.1E-13    | 8.0E-01     | -100001 | -411.01  | -18    |

Table 2: Results for package DQP when a direct subproblem solver is used.

| Name      | Obj. Value      | Primal Viol. | Dual Viol. | Comp. Viol. | Iters.  | Time     | Status |
|-----------|-----------------|--------------|------------|-------------|---------|----------|--------|
| AUG2DC    | 1.81836807E+06  | 5.7E-13      | 5.7E-14    | 3.6E-10     | 1       | 0.07     | 0      |
| AUG2DCQP  | 6.49813474E+06  | 1.4E-12      | 2.3E-13    | 3.8E-09     | 6815    | 217.79   | 0      |
| AUG3DC    | 2.76540711E+04  | 1.5E-13      | 1.8E-15    | 6.1E-13     | 1       | 0.08     | 0      |
| AUG3DCQP  | 6.15603837E+04  | 3.6E-14      | 3.6E-15    | 1.9E-12     | 135     | 8.76     | 0      |
| BTS4      | 6.90514292E+07  | 5.8E-05      | 2.3E-13    | 2.3E-01     | -4398   | -1800.10 | -19    |
| CBS       | 5.36161663E+06  | 1.4E-12      | 1.7E-13    | 3.8E-11     | 6       | 0.26     | 0      |
| CONT-050  | 0.00000000E+00  | 6.8E+00      | 3.2E+62    | 4.6E+62     | -2429   | -45.54   | -5     |
| CONT1-100 | 0.00000000E+00  | 9.7E+00      | 2.7E+61    | 1.7E+62     | -3716   | -339.94  | -5     |
| CONT1-200 | 0.00000000E+00  | 8.7E+00      | 1.0E+62    | 1.8E+62     | -3622   | -1443.41 | -5     |
| DALE      | 1.82596990E+04  | 1.1E-10      | 1.8E-15    | 2.9E-10     | 6       | 0.16     | 0      |
| DEGENQP   | 2.35828854E+01  | 7.6E+00      | 4.5E+03    | 1.2E+01     | -17642  | -1800.10 | -19    |
| DUAL1     | 3.50129678E-02  | 2.1E-13      | 4.8E-15    | 7.6E-15     | 12      | 0.01     | 0      |
| DUAL2     | 3.37336714E-02  | 6.5E-14      | 2.1E-15    | 2.3E-15     | 8       | 0.01     | 0      |
| DUAL3     | 1.35755833E-01  | 5.6E-14      | 4.0E-15    | 8.1E-15     | 8       | 0.02     | 0      |
| DUAL4     | 7.46090649E-01  | 2.2E-15      | 4.6E-15    | 1.9E-15     | 4       | 0.00     | 0      |
| HIE1327D  | 2.48905242E+06  | 8.5E-07      | 1.1E-13    | 3.1E-03     | 3062    | 255.06   | 0      |
| HIE1372D  | 8.06298962E+05  | 5.4E-11      | 2.8E-14    | 7.3E-08     | 6       | 0.06     | 0      |
| HIER13    | 7.50699445E+06  | 9.2E-04      | 2.3E-13    | 1.5E+01     | -4251   | -1800.17 | -19    |
| HIER133A  | 7.28065677E+06  | 1.2E-03      | 1.1E-13    | 9.3E+00     | -3409   | -1800.35 | -19    |
| HIER133B  | 7.28066894E+06  | 2.3E-03      | 2.3E-13    | 1.0E+01     | -3433   | -1800.45 | -19    |
| HIER133C  | 7.28068850E+06  | 8.2E-04      | 1.1E-13    | 6.3E+00     | -3410   | -1800.31 | -19    |
| HIER133D  | 2.99558560E+07  | 1.7E-03      | 2.3E-13    | 2.7E+01     | -3694   | -1800.31 | -19    |
| HIER133E  | 2.99555414E+07  | 7.9E-03      | 2.3E-13    | 7.6E+01     | -3443   | -1800.12 | -19    |
| HIER16    | 1.04280522E+07  | 2.4E-02      | 1.1E-13    | 9.4E+02     | -903    | -1801.11 | -19    |
| HIER163A  | 8.68585956E+06  | 4.1E-02      | 5.7E-14    | 8.7E+02     | -796    | -1801.97 | -19    |
| HIER163B  | 8.68605451E+06  | 5.3E-02      | 1.1E-13    | 8.4E+02     | -787    | -1800.68 | -19    |
| HIER163C  | 8.68488527E+06  | 6.0E-02      | 5.7E-14    | 9.5E+02     | -789    | -1800.34 | -19    |
| HIER163D  | 3.47533066E+07  | 6.1E-02      | 2.3E-13    | 2.6E+03     | -794    | -1801.22 | -19    |
| HIER163E  | 3.47729480E+07  | 3.4E-02      | 2.3E-13    | 1.0E+03     | -795    | -1801.47 | -19    |
| HUES-MOD  | 3.48245418E+07  | 2.7E-12      | 4.4E-16    | 2.6E-07     | 4       | 0.07     | 0      |
| HUESTS    | 3.48245418E+07  | 1.1E-12      | 0.0E+00    | 1.1E-04     | 4       | 0.02     | 0      |
| JJTABEL3  | 1.30980708E+14  | 4.0E-01      | 4.7E-10    | 1.1E+07     | -100001 | -839.10  | -18    |
| KSP       | 5.75797349E-01  | 5.6E-07      | 2.8E-17    | 1.1E-16     | 81304   | 23.90    | 0      |
| LASER     | 0.00000000E+00  | 2.1E+02      | 2.5E+62    | 1.5E+64     | -64     | -0.61    | -5     |
| LISWET1   | 7.22189448E+00  | 1.3E-11      | 1.3E-12    | 1.5E-07     | 1169    | 2.23     | 0      |
| LISWET2   | 4.99808204E+00  | 5.0E-07      | 2.8E-15    | 4.6E-08     | 482     | 1.03     | 0      |
| LISWET3   | 4.99777877E+00  | 1.6E-15      | 2.1E-16    | 1.8E-15     | 52      | 0.19     | 0      |
| LISWET4   | 4.99781511E+00  | 2.2E-15      | 2.6E-16    | 6.8E-15     | 87      | 0.24     | 0      |
| LISWET5   | 4.99783185E+00  | 2.7E-15      | 6.1E-16    | 5.9E-15     | 68      | 0.22     | 0      |
| LISWET6   | 4.99789739E+00  | 2.2E-15      | 2.2E-16    | 4.8E-15     | 69      | 0.22     | 0      |
| LISWET7   | 9.98951642E+01  | 8.7E-11      | 7.3E-12    | 7.6E-06     | 1659    | 3.62     | 0      |
| LISWET8   | 1.43130575E+02  | 8.7E-11      | 7.3E-12    | 5.9E-06     | 897     | 2.63     | 0      |
| LISWET9   | 3.92920161E+02  | 8.7E-11      | 7.8E-12    | 6.6E-06     | 905     | 4.00     | 0      |
| LISWET10  | 9.89648678E+00  | 1.1E-11      | 1.0E-12    | 1.2E-07     | 622     | 1.46     | 0      |
| LISWET12  | 3.47518978E+02  | 8.7E-11      | 7.3E-12    | 7.0E-06     | 936     | 3.63     | 0      |
| MOSARQP1  | -3.82140980E+03 | 5.4E-15      | 7.1E-15    | 3.0E-15     | 84      | 0.55     | 0      |
| MOSARQP2  | -5.05259194E+03 | 2.2E-14      | 7.1E-15    | 7.4E-15     | 34      | 0.21     | 0      |
| NINE12    | 3.27678548E+07  | 2.9E-08      | 2.3E-13    | 1.1E-03     | 176     | 201.30   | 0      |
| NINE5D    | 9.75187214E+06  | 3.7E+02      | 1.1E-13    | 1.5E+05     | -168    | -1807.39 | -19    |
| NINENEW   | 2.73588127E+07  | 2.2E-02      | 1.1E-13    | 6.0E+02     | -2776   | -1800.03 | -19    |
| OSORIO    | 1.13368430E+01  | 1.8E-14      | 4.4E-16    | 1.8E-14     | 7       | 0.33     | 0      |
| POWELL20  | 5.20895828E+10  | 9.3E-10      | 0.0E+00    | 5.8E-03     | 2501    | 38.16    | 0      |
| QPBAND    | 0.00000000E+00  | 0.0E+00      | 2.3E+62    | 4.9E+65     | -4210   | -1491.66 | -5     |
| STCQP1    | 3.67100485E+05  | 3.2E-13      | 2.3E-12    | 7.7E-10     | 4       | 2.90     | 0      |
| STCQP2    | 3.71892743E+04  | 1.8E-14      | 6.5E-13    | 1.3E-12     | 17      | 2.39     | 0      |
| TABLE1    | 2.78623226E+12  | 4.3E-08      | 2.9E-11    | 3.3E-02     | 279     | 1.25     | 0      |
| TABLE3    | 2.93000638E+09  | 6.7E-07      | 3.6E-12    | 2.7E-02     | 21840   | 505.33   | 0      |
| TABLE4    | 2.93000638E+09  | 8.1E-07      | 3.6E-12    | 2.4E-02     | 22498   | 533.54   | 0      |
| TABLE5    | 2.93000638E+09  | 3.9E-07      | 1.8E-12    | 1.7E-02     | 24521   | 573.97   | 0      |
| TABLE6    | 2.78623225E+12  | 1.4E-04      | 1.2E-10    | 1.5E+07     | -100001 | -438.35  | -18    |
| TABLE7    | 7.79587339E+08  | 2.2E-11      | 9.1E-13    | 4.6E-07     | 22      | 0.04     | 0      |
| TABLE8    | 1.91933038E+02  | 1.8E-14      | 1.8E-15    | 1.8E-13     | 3       | 0.01     | 0      |
| TARGUS    | 1.68744463E+07  | 1.7E-12      | 2.3E-13    | 8.3E-09     | 201     | 0.07     | 0      |
| TOYSARAH  | 5.88881391E+19  | 5.9E+05      | 1.2E-07    | 2.9E+15     | -73844  | -1800.00 | -19    |
| TWOSIN6   | 9.47197659E+06  | 1.3E+02      | 1.1E-13    | 1.3E+05     | -366    | -1801.26 | -19    |
| YAO       | 1.97704616E+02  | 2.3E-10      | 1.6E-11    | 3.2E-05     | 3       | 0.01     | 0      |

| Status | Meaning                                          |
|--------|--------------------------------------------------|
| 0      | Optimality conditions met.                       |
| -5     | Problem was determined to be locally infeasible. |
| -18    | Maximum iteration limit was reached.             |
| -19    | Maximum time limit was reached.                  |

Table 3: Meaning of the status column in Tables 1 and 2.

### 3 Required Iterations and Time to Reach Various Accuracies

Tables 4 (iterative subproblem solver) and 5 (direct subproblem solver) give the total number of iterations (Iters.) and total time (Time) needed to meet termination tolerances  $10^{-1}$  through  $10^{-6}$ .

Table 4: Checkpoint information for package DQP when an iterative subproblem solver is used.

| Name      | Iters.    |           |           |           |           |           | Time      |           |           |           |           |           |
|-----------|-----------|-----------|-----------|-----------|-----------|-----------|-----------|-----------|-----------|-----------|-----------|-----------|
|           | $10^{-1}$ | $10^{-2}$ | $10^{-3}$ | $10^{-4}$ | $10^{-5}$ | $10^{-6}$ | $10^{-1}$ | $10^{-2}$ | $10^{-3}$ | $10^{-4}$ | $10^{-5}$ | $10^{-6}$ |
| AUG2DC    | 2         | 2         | 2         | 3         | 3         | 4         | 0.05      | 0.05      | 0.05      | 0.08      | 0.08      | 0.10      |
| AUG2DCCQP | 23        | 25        | 27        | 31        | 33        | 35        | 0.69      | 0.74      | 0.79      | 0.90      | 0.95      | 1.00      |
| AUG3DC    | 1         | 1         | 1         | 1         | 1         | 1         | 0.02      | 0.02      | 0.02      | 0.02      | 0.02      | 0.02      |
| AUG3DCCQP | 16        | 16        | 16        | 16        | 16        | 16        | 0.54      | 0.54      | 0.54      | 0.54      | 0.54      | 0.54      |
| BTS4      | 8         | 8         | 9         | 9         | 10        | 10        | 1.03      | 1.03      | 1.16      | 1.16      | 1.28      | 1.28      |
| CBS       | 6         | 6         | 6         | 7         | 7         | 7         | 0.11      | 0.11      | 0.11      | 0.13      | 0.13      | 0.13      |
| CONT1-050 | 258       | 384       | 1126      | 1274      | 1462      | 1694      | 2.07      | 3.03      | 8.68      | 9.80      | 11.23     | 13.00     |
| CONT1-100 | 34        | 8565      | 10864     | 24240     | 25950     | 28743     | 1.13      | 267.10    | 338.58    | 754.25    | 807.37    | 894.13    |
| CONT1-200 | 2583      | 2703      | -1        | -1        | -1        | -1        | 355.00    | 370.17    | -1.00     | -1.00     | -1.00     | -1.00     |
| DALE      | 5         | 5         | 5         | 5         | 6         | 6         | 0.16      | 0.16      | 0.16      | 0.16      | 0.19      | 0.19      |
| DEGENQP   | 96        | 96        | 98        | 102       | 102       | 102       | 7.28      | 7.28      | 7.33      | 7.44      | 7.44      | 7.44      |
| DUAL1     | 8         | 9         | 10        | 10        | 10        | 10        | 0.01      | 0.01      | 0.01      | 0.01      | 0.01      | 0.01      |
| DUAL2     | 6         | 8         | 8         | 8         | 8         | 8         | 0.01      | 0.01      | 0.01      | 0.01      | 0.01      | 0.01      |
| DUAL3     | 4         | 7         | 7         | 8         | 8         | 8         | 0.00      | 0.01      | 0.01      | 0.01      | 0.01      | 0.01      |
| DUAL4     | 1         | 3         | 3         | 3         | 4         | 4         | 0.00      | 0.00      | 0.00      | 0.00      | 0.00      | 0.00      |
| FIVE20B   | 12        | 14        | 15        | 17        | 19        | 21        | 1.93      | 2.24      | 2.40      | 2.72      | 3.03      | 3.35      |
| FIVE20C   | 36        | 38        | 40        | 42        | 44        | 46        | 6.28      | 6.62      | 6.97      | 7.32      | 7.66      | 8.01      |
| HIE1327D  | 11        | 14        | 17        | 18        | 20        | 21        | 0.05      | 0.06      | 0.07      | 0.08      | 0.08      | 0.09      |
| HIE1372D  | 5         | 5         | 7         | 7         | 7         | 7         | 0.01      | 0.01      | 0.02      | 0.02      | 0.02      | 0.02      |
| HIER13    | 4         | 4         | 4         | 5         | 6         | 6         | 0.04      | 0.04      | 0.04      | 0.05      | 0.06      | 0.06      |
| HIER133A  | 10        | 11        | 11        | 18        | 18        | 18        | 0.09      | 0.10      | 0.10      | 0.17      | 0.17      | 0.17      |
| HIER133B  | 10        | 11        | 11        | 18        | 18        | 18        | 0.09      | 0.10      | 0.10      | 0.17      | 0.17      | 0.17      |
| HIER133C  | 10        | 11        | 11        | 18        | 18        | 18        | 0.10      | 0.11      | 0.11      | 0.17      | 0.17      | 0.17      |
| HIER133D  | 13        | 15        | 15        | 15        | 18        | 20        | 0.12      | 0.14      | 0.14      | 0.14      | 0.17      | 0.18      |
| HIER133E  | 14        | 17        | 19        | 20        | 21        | 23        | 0.13      | 0.16      | 0.18      | 0.19      | 0.19      | 0.21      |
| HIER16    | 6         | 6         | 6         | 7         | 8         | 8         | 0.09      | 0.09      | 0.09      | 0.11      | 0.12      | 0.12      |
| HIER163A  | 14        | 15        | 18        | 21        | 22        | 24        | 0.22      | 0.24      | 0.29      | 0.33      | 0.35      | 0.38      |
| HIER163B  | 14        | 15        | 18        | 21        | 22        | 24        | 0.22      | 0.24      | 0.29      | 0.33      | 0.35      | 0.38      |
| HIER163C  | 14        | 15        | 18        | 21        | 22        | 24        | 0.22      | 0.24      | 0.29      | 0.33      | 0.35      | 0.38      |
| HIER163D  | 17        | 19        | 22        | 22        | 24        | 26        | 0.27      | 0.30      | 0.35      | 0.35      | 0.38      | 0.41      |
| HIER163E  | 17        | 19        | 22        | 22        | 24        | 26        | 0.27      | 0.30      | 0.35      | 0.35      | 0.38      | 0.41      |
| HUES-MOD  | 4         | 4         | 4         | 4         | 4         | 4         | 0.01      | 0.01      | 0.01      | 0.01      | 0.01      | 0.01      |
| HUESTIS   | 4         | 4         | 4         | 4         | 4         | 4         | 0.00      | 0.00      | 0.00      | 0.00      | 0.00      | 0.00      |
| JJTABEL3  | 6541      | 6541      | 6541      | 6543      | 6544      | 6544      | 50.49     | 50.49     | 50.49     | 50.51     | 50.52     | 50.52     |
| KSIP      | 5         | 103       | 1519      | 8884      | -1        | -1        | 0.02      | 0.28      | 1.50      | 3.68      | -1.00     | -1.00     |
| LASER     | -1        | -1        | -1        | -1        | -1        | -1        | -1.00     | -1.00     | -1.00     | -1.00     | -1.00     | -1.00     |
| LISWET1   | 0         | 6         | 21        | 295       | -1        | -1        | 0.00      | 0.02      | 0.08      | 1.21      | -1.00     | -1.00     |
| LISWET2   | 0         | 4         | 22        | 54        | 441       | 5920      | 0.00      | 0.01      | 0.09      | 0.22      | 1.79      | 24.15     |
| LISWET3   | 0         | 4         | 20        | 77        | 436       | 1649      | 0.00      | 0.01      | 0.08      | 0.30      | 1.73      | 6.53      |
| LISWET4   | 0         | 4         | 29        | 76        | 625       | 5786      | 0.00      | 0.01      | 0.11      | 0.30      | 2.46      | 22.81     |
| LISWET5   | 0         | 4         | 17        | 117       | 522       | 3208      | 0.00      | 0.01      | 0.07      | 0.46      | 2.07      | 12.76     |
| LISWET6   | 0         | 4         | 26        | 148       | 590       | 2360      | 0.00      | 0.01      | 0.10      | 0.59      | 2.35      | 9.40      |
| LISWET7   | 0         | 5         | 16        | 783       | -1        | -1        | 0.00      | 0.02      | 0.06      | 3.21      | -1.00     | -1.00     |
| LISWET8   | 0         | 4         | 316       | -1        | -1        | -1        | 0.00      | 0.01      | 1.25      | -1.00     | -1.00     | -1.00     |
| LISWET9   | 0         | 37        | 18665     | -1        | -1        | -1        | 0.00      | 0.14      | 73.61     | -1.00     | -1.00     | -1.00     |
| LISWET10  | 0         | 5         | 60        | 1767      | -1        | -1        | 0.00      | 0.02      | 0.24      | 7.05      | -1.00     | -1.00     |
| LISWET12  | 0         | 40        | 3395      | -1        | -1        | -1        | 0.00      | 0.15      | 13.34     | -1.00     | -1.00     | -1.00     |
| MOSARQP1  | 46        | 51        | 51        | 53        | 57        | 62        | 0.74      | 0.82      | 0.82      | 0.84      | 0.90      | 0.97      |
| MOSARQP2  | 20        | 20        | 20        | 20        | 20        | 20        | 0.37      | 0.37      | 0.37      | 0.37      | 0.37      | 0.37      |
| NINE12    | 8         | 8         | 9         | 10        | 11        | 12        | 0.32      | 0.32      | 0.35      | 0.39      | 0.43      | 0.47      |
| NINE5D    | 8         | 11        | 11        | 12        | 12        | 13        | 0.38      | 0.52      | 0.52      | 0.57      | 0.57      | 0.62      |
| NINENEW   | 7         | 8         | 9         | 10        | 12        | 12        | 0.17      | 0.20      | 0.22      | 0.24      | 0.29      | 0.29      |
| OSORIO    | 2         | 3         | 3         | 4         | 6         | 7         | 0.04      | 0.05      | 0.05      | 0.05      | 0.06      | 0.06      |
| POWELL20  | 9054      | 13469     | 16136     | 18570     | 21666     | 24611     | 143.16    | 221.31    | 268.59    | 311.74    | 366.65    | 418.85    |
| QPBAND    | -1        | -1        | -1        | -1        | -1        | -1        | -1.00     | -1.00     | -1.00     | -1.00     | -1.00     | -1.00     |
| STCQP1    | 4         | 4         | 4         | 4         | 4         | 4         | 2.90      | 2.90      | 2.90      | 2.90      | 2.90      | 2.90      |
| STCQP2    | 25        | 25        | 27        | 28        | 30        | 32        | 15.72     | 15.72     | 16.90     | 17.50     | 18.68     | 19.87     |
| TABLE1    | 33        | 1119      | 1119      | 1121      | 1121      | 1122      | 0.12      | 4.12      | 4.12      | 4.13      | 4.13      | 4.13      |
| TABLE3    | 19        | 21        | 22        | 25        | 27        | 29        | 0.28      | 0.31      | 0.33      | 0.37      | 0.40      | 0.43      |
| TABLE4    | 19        | 21        | 22        | 25        | 27        | 29        | 0.28      | 0.31      | 0.32      | 0.37      | 0.40      | 0.43      |
| TABLE5    | 19        | 21        | 22        | 25        | 27        | 29        | 0.28      | 0.31      | 0.32      | 0.37      | 0.40      | 0.43      |
| TABLE6    | 23        | 1096      | 1097      | 1097      | 1097      | 1098      | 0.09      | 4.05      | 4.05      | 4.05      | 4.05      | 4.06      |
| TABLE7    | 9         | 10        | 11        | 12        | 12        | 13        | 0.02      | 0.02      | 0.02      | 0.02      | 0.02      | 0.02      |
| TABLE8    | 3         | 3         | 3         | 3         | 3         | 3         | 0.01      | 0.01      | 0.01      | 0.01      | 0.01      | 0.01      |
| TARGUS    | 185       | 185       | 185       | 185       | 185       | 185       | 0.11      | 0.11      | 0.11      | 0.11      | 0.11      | 0.11      |
| TOYSARAH  | -1        | -1        | -1        | -1        | -1        | -1        | -1.00     | -1.00     | -1.00     | -1.00     | -1.00     | -1.00     |
| TWO5IN6   | 6         | 8         | 8         | 9         | 10        | 10        | 0.16      | 0.22      | 0.22      | 0.24      | 0.27      | 0.27      |
| YAO       | 47        | 71        | 3778      | -1        | -1        | -1        | 0.19      | 0.29      | 15.45     | -1.00     | -1.00     | -1.00     |

Table 5: Checkpoint information for package DQP when a direct subproblem solver is used.

| Name      | Iters.           |                  |                  |                  |                  |                  | Time             |                  |                  |                  |                  |                  |
|-----------|------------------|------------------|------------------|------------------|------------------|------------------|------------------|------------------|------------------|------------------|------------------|------------------|
|           | 10 <sup>-1</sup> | 10 <sup>-2</sup> | 10 <sup>-3</sup> | 10 <sup>-4</sup> | 10 <sup>-5</sup> | 10 <sup>-6</sup> | 10 <sup>-1</sup> | 10 <sup>-2</sup> | 10 <sup>-3</sup> | 10 <sup>-4</sup> | 10 <sup>-5</sup> | 10 <sup>-6</sup> |
| AUG2DC    | 1                | 1                | 1                | 1                | 1                | 1                | 0.27             | 0.27             | 0.27             | 0.27             | 0.27             | 0.27             |
| AUG2DCQP  | 6815             | 6815             | 6815             | 6815             | 6815             | 6815             | 890.77           | 890.77           | 890.77           | 890.77           | 890.77           | 890.77           |
| AUG3DC    | 1                | 1                | 1                | 1                | 1                | 1                | 0.31             | 0.31             | 0.31             | 0.31             | 0.31             | 0.31             |
| AUG3DCQP  | 134              | 134              | 134              | 135              | 135              | 135              | 33.76            | 33.76            | 33.76            | 35.20            | 35.20            | 35.20            |
| BTS4      | 486              | 1314             | 2484             | 4030             | -1               | -1               | 863.80           | 2321.94          | 4362.33          | 7062.49          | -1.00            | -1.00            |
| CBS       | 6                | 6                | 6                | 6                | 6                | 6                | 1.35             | 1.35             | 1.35             | 1.35             | 1.35             | 1.35             |
| CONT-050  | -1               | -1               | -1               | -1               | -1               | -1               | -1.00            | -1.00            | -1.00            | -1.00            | -1.00            | -1.00            |
| CONT1-100 | -1               | -1               | -1               | -1               | -1               | -1               | -1.00            | -1.00            | -1.00            | -1.00            | -1.00            | -1.00            |
| CONT1-200 | -1               | -1               | -1               | -1               | -1               | -1               | -1.00            | -1.00            | -1.00            | -1.00            | -1.00            | -1.00            |
| DALE      | 5                | 5                | 6                | 6                | 6                | 6                | 0.53             | 0.53             | 0.64             | 0.64             | 0.64             | 0.64             |
| DEGENQP   | -1               | -1               | -1               | -1               | -1               | -1               | -1.00            | -1.00            | -1.00            | -1.00            | -1.00            | -1.00            |
| DUAL1     | 8                | 10               | 10               | 11               | 12               | 12               | 0.01             | 0.01             | 0.01             | 0.01             | 0.01             | 0.01             |
| DUAL2     | 6                | 7                | 8                | 8                | 8                | 8                | 0.01             | 0.01             | 0.01             | 0.01             | 0.01             | 0.01             |
| DUAL3     | 4                | 6                | 7                | 8                | 8                | 8                | 0.01             | 0.01             | 0.01             | 0.01             | 0.01             | 0.01             |
| DUAL4     | 1                | 3                | 3                | 3                | 4                | 4                | 0.00             | 0.00             | 0.00             | 0.00             | 0.00             | 0.00             |
| HIE1327D  | 87               | 189              | 603              | 1222             | 2500             | 3062             | 20.99            | 44.45            | 138.72           | 280.88           | 577.09           | 704.46           |
| HIE1372D  | 6                | 6                | 6                | 6                | 6                | 6                | 0.15             | 0.15             | 0.15             | 0.15             | 0.15             | 0.15             |
| HIER13    | 1006             | 2481             | -1               | -1               | -1               | -1               | 1132.75          | 2767.33          | -1.00            | -1.00            | -1.00            | -1.00            |
| HIER133A  | 965              | 1829             | -1               | -1               | -1               | -1               | 1340.32          | 2544.38          | -1.00            | -1.00            | -1.00            | -1.00            |
| HIER133B  | 793              | 1926             | -1               | -1               | -1               | -1               | 1096.55          | 2643.27          | -1.00            | -1.00            | -1.00            | -1.00            |
| HIER133C  | 1302             | 2060             | -1               | -1               | -1               | -1               | 1827.50          | 2873.03          | -1.00            | -1.00            | -1.00            | -1.00            |
| HIER133D  | 1997             | 2743             | -1               | -1               | -1               | -1               | 2599.48          | 3525.58          | -1.00            | -1.00            | -1.00            | -1.00            |
| HIER133E  | 1645             | 2716             | -1               | -1               | -1               | -1               | 2267.25          | 3750.37          | -1.00            | -1.00            | -1.00            | -1.00            |
| HIER16    | 846              | -1               | -1               | -1               | -1               | -1               | 5554.50          | -1.00            | -1.00            | -1.00            | -1.00            | -1.00            |
| HIER163A  | 721              | -1               | -1               | -1               | -1               | -1               | 5508.16          | -1.00            | -1.00            | -1.00            | -1.00            | -1.00            |
| HIER163B  | 731              | -1               | -1               | -1               | -1               | -1               | 5602.53          | -1.00            | -1.00            | -1.00            | -1.00            | -1.00            |
| HIER163C  | 763              | -1               | -1               | -1               | -1               | -1               | 5823.36          | -1.00            | -1.00            | -1.00            | -1.00            | -1.00            |
| HIER163D  | -1               | -1               | -1               | -1               | -1               | -1               | -1.00            | -1.00            | -1.00            | -1.00            | -1.00            | -1.00            |
| HIER163E  | 381              | -1               | -1               | -1               | -1               | -1               | 2889.72          | -1.00            | -1.00            | -1.00            | -1.00            | -1.00            |
| HUES-MOD  | 4                | 4                | 4                | 4                | 4                | 4                | 0.07             | 0.07             | 0.07             | 0.07             | 0.07             | 0.07             |
| HUESTIS   | 4                | 4                | 4                | 4                | 4                | 4                | 0.02             | 0.02             | 0.02             | 0.02             | 0.02             | 0.02             |
| JJTABEL3  | -1               | -1               | -1               | -1               | -1               | -1               | -1.00            | -1.00            | -1.00            | -1.00            | -1.00            | -1.00            |
| KSP       | 290              | 367              | 3005             | 21811            | 81299            | 81304            | 6.38             | 6.77             | 8.55             | 13.87            | 27.70            | 27.70            |
| LASER     | -1               | -1               | -1               | -1               | -1               | -1               | -1.00            | -1.00            | -1.00            | -1.00            | -1.00            | -1.00            |
| LISWET1   | 0                | 5                | 1169             | 1169             | 1169             | 1169             | 0.00             | 0.04             | 2.21             | 2.21             | 2.21             | 2.21             |
| LISWET2   | 0                | 4                | 23               | 127              | 320              | 482              | 0.00             | 0.04             | 0.16             | 0.42             | 0.80             | 1.03             |
| LISWET3   | 0                | 4                | 15               | 48               | 52               | 52               | 0.00             | 0.04             | 0.13             | 0.18             | 0.19             | 0.19             |
| LISWET4   | 0                | 5                | 15               | 76               | 87               | 87               | 0.00             | 0.05             | 0.12             | 0.22             | 0.24             | 0.24             |
| LISWET5   | 0                | 4                | 15               | 55               | 66               | 68               | 0.00             | 0.05             | 0.13             | 0.20             | 0.22             | 0.22             |
| LISWET6   | 0                | 4                | 14               | 53               | 69               | 69               | 0.00             | 0.04             | 0.12             | 0.19             | 0.22             | 0.22             |
| LISWET7   | 0                | 4                | 1659             | 1659             | 1659             | 1659             | 0.00             | 0.04             | 3.61             | 3.61             | 3.61             | 3.61             |
| LISWET8   | 0                | 4                | 897              | 897              | 897              | 897              | 0.00             | 0.04             | 2.63             | 2.63             | 2.63             | 2.63             |
| LISWET9   | 0                | 901              | 904              | 905              | 905              | 905              | 0.00             | 3.99             | 3.99             | 3.99             | 3.99             | 3.99             |
| LISWET10  | 0                | 5                | 51               | 622              | 622              | 622              | 0.00             | 0.04             | 0.22             | 1.46             | 1.46             | 1.46             |
| LISWET12  | 0                | 936              | 936              | 936              | 936              | 936              | 0.00             | 3.62             | 3.62             | 3.62             | 3.62             | 3.62             |
| MOSARQP1  | 79               | 83               | 84               | 84               | 84               | 84               | 0.52             | 0.55             | 0.55             | 0.55             | 0.55             | 0.55             |
| MOSARQP2  | 33               | 34               | 34               | 34               | 34               | 34               | 0.21             | 0.21             | 0.21             | 0.21             | 0.21             | 0.21             |
| NINE12    | 175              | 176              | 176              | 176              | 176              | 176              | 479.41           | 481.79           | 481.79           | 481.79           | 481.79           | 481.79           |
| NINE5D    | -1               | -1               | -1               | -1               | -1               | -1               | -1.00            | -1.00            | -1.00            | -1.00            | -1.00            | -1.00            |
| NINENEW   | 646              | 2706             | -1               | -1               | -1               | -1               | 1037.07          | 4417.92          | -1.00            | -1.00            | -1.00            | -1.00            |
| OSORIO    | 3                | 3                | 4                | 5                | 7                | 7                | 0.46             | 0.46             | 0.71             | 1.40             | 1.90             | 1.90             |
| POWELL20  | 2501             | 2501             | 2501             | 2501             | 2501             | 2501             | 186.30           | 186.30           | 186.30           | 186.30           | 186.30           | 186.30           |
| QPBAND    | -1               | -1               | -1               | -1               | -1               | -1               | -1.00            | -1.00            | -1.00            | -1.00            | -1.00            | -1.00            |
| STCQP1    | 4                | 4                | 4                | 4                | 4                | 4                | 6.09             | 6.09             | 6.09             | 6.09             | 6.09             | 6.09             |
| STCQP2    | 16               | 17               | 17               | 17               | 17               | 17               | 6.41             | 6.65             | 6.65             | 6.65             | 6.65             | 6.65             |
| TABLE1    | 43               | 46               | 47               | 63               | 279              | 279              | 0.80             | 0.86             | 0.88             | 1.17             | 5.11             | 5.11             |
| TABLE3    | 4606             | 8008             | 11582            | 14922            | 18186            | 21840            | 456.39           | 791.98           | 1153.32          | 1497.13          | 1829.26          | 2198.03          |
| TABLE4    | 4208             | 8320             | 11752            | 15204            | 18682            | 22498            | 439.86           | 872.43           | 1219.74          | 1573.94          | 1927.13          | 2322.22          |
| TABLE5    | 4366             | 8589             | 12901            | 16749            | 20515            | 24521            | 444.67           | 874.73           | 1318.60          | 1717.90          | 2104.66          | 2511.45          |
| TABLE6    | 60               | 63               | 64               | 68               | 161              | -1               | 1.05             | 1.10             | 1.12             | 1.19             | 2.76             | -1.00            |
| TABLE7    | 22               | 22               | 22               | 22               | 22               | 22               | 0.04             | 0.04             | 0.04             | 0.04             | 0.04             | 0.04             |
| TABLE8    | 3                | 3                | 3                | 3                | 3                | 3                | 0.01             | 0.01             | 0.01             | 0.01             | 0.01             | 0.01             |
| TARGUS    | 201              | 201              | 201              | 201              | 201              | 201              | 0.07             | 0.07             | 0.07             | 0.07             | 0.07             | 0.07             |
| TOYSARAH  | -1               | -1               | -1               | -1               | -1               | -1               | -1.00            | -1.00            | -1.00            | -1.00            | -1.00            | -1.00            |
| TWOSIN6   | -1               | -1               | -1               | -1               | -1               | -1               | -1.00            | -1.00            | -1.00            | -1.00            | -1.00            | -1.00            |
| YAO       | 3                | 3                | 3                | 3                | 3                | 3                | 0.01             | 0.01             | 0.01             | 0.01             | 0.01             | 0.01             |

## References

- [1] P. R. Amestoy, I. S. Duff, J.-Y. L'Excellent, and J. Koster. A fully asynchronous multifrontal solver using distributed dynamic scheduling. *SIAM Journal on Matrix Analysis and Applications*, 23(1):15–41, 2001.
- [2] I. S. Duff and J. K. Reid. The design of MA48: a code for the direct solution of sparse unsymmetric linear systems of equations. *ACM Transactions on Mathematical Software*, 22(2):187–226, 1996.
- [3] P. E. Gill, W. Murray, M. A. Saunders, and M. H. Wright. Maintaining LU factors of a general sparse matrix. *Linear Algebra and its Applications*, 88/89:239–270, 1987.
